# Supplementary material for: The Bee Microbiome: Impact on Bee Health and Model for Evolution and Ecology of Host-Microbe Interactions
Source: PubMed Central journal article supplement — mBio. 2016 Apr 26;7(2):e02164-15. doi: 10.1128/mBio.02164-15 (PMC4850275; doi:10.1128/mbio.02164-15), 2016-04-26
Supplement: mbo002162784s2.pdf [file mbo002162784s2.pdf]

## Bee microbes

- Ahn, J.-H., I.-P. Hong, J.-I. Bok, B.-Y. Kim, J. Song, and H.-Y. Weon. 2012. Pyrosequencing analysis of the bacterial communities in the guts of honey bees *Apis cerana* and *Apis mellifera* in Korea. *Journal of Microbiology* 50:735–745.
- Aizenberg-Gershtein, Y., I. Izhaki, and M. Halpern. 2013. Do honeybees shape the bacterial community composition in floral nectar? *PLoS ONE* 8:e67556.
- Anderson, K. E., A. Johansson, T. H. Sheehan, B. M. Mott, V. Corby-Harris, L. Johnstone, R. Sprissler, and W. Fitz. 2013a. Draft genome sequences of two *Bifidobacterium* sp. from the honey bee (*Apis mellifera*). *Gut Pathogens* 4:42.
- Anderson, K. E., T. H. Sheehan, B. M. Mott, P. Maes, L. Snyder, M. R. Schwan, A. Walton, B. M. Jones, and V. Corby-Harris. 2013b. Microbial ecology of the hive and pollination landscape: bacterial associates from floral nectar, the alimentary tract and stored food of honey bees (*Apis mellifera*). *PLoS ONE* 8:e83125.
- Babendreier, D., D. Joller, and J. Romeis. 2007. Bacterial community structures in honeybee intestines and their response to two insecticidal proteins. *FEMS Microbiology Ecology* 59:600–610.
- Corby-Harris, V., L. A. Snyder, M. R. Schwan, P. Maes, Q. S. McFrederick, and K. E. Anderson. 2014a. Origin and effect of Alpha 2.2 Acetobacteraceae in honey bee larvae and description of *Parasaccharibacter apium* gen. nov., sp. nov. *Applied and Environmental Microbiology* 80:7460–7472.
- Corby-Harris, V., P. Maes, and K. E. Anderson. 2014b. The bacterial communities associated with honey bee (*Apis mellifera*) foragers. *PLoS ONE* 9:e95056.
- Engel, P., W. K. Kwong, and N. A. Moran. 2013. *Frischella perrara* gen. nov., sp. nov., a gammaproteobacterium isolated from the gut of the honey bee, *Apis mellifera*. *International Journal of Systematic and Evolutionary Microbiology* 63:3646–3651.
- Gerth, M., A. Geißler, and C. Bleidorn. 2011. Wolbachia infections in bees (Anthophila) and possible implications for DNA barcoding. *Systematics and Biodiversity* 9:319–327.
- Gerth, M., A. Saeed, J. A. White, and C. Bleidorn. 2015. Extensive screen for bacterial endosymbionts reveals taxon-specific distribution patterns among bees (Hymenoptera, Anthophila). *FEMS Microbiology Ecology* 91:fiv047–fiv047.
- Horton, M. A., R. Oliver, and I. L. Newton. 2015. No apparent correlation between honey bee forager gut microbiota and honey production. *PeerJ* 3:e1329.
- Jeyaprakash, A., and M. Hoy. 2003. Bacterial diversity in worker adults of *Apis mellifera capensis* and *Apis mellifera scutellata* (Insecta: Hymenoptera) assessed using 16S rRNA sequences. *Journal of Invertebrate Pathology* 84:96–103.
- Kešnerová, L., Moritz, R., & Engel, P. 2015. *Bartonella apis* sp. nov., a honey bee gut symbiont of the class Alphaproteobacteria. *International journal of systematic and evolutionary microbiology* 66(1):414-21.
- Koch, H., and P. Schmid-Hempel. 2011. Bacterial communities in central European bumblebees: low diversity and high specificity. *Microbial Ecology* 62:121–133.
- Kwong, W. K., A. L. Mancenido, and N. A. Moran. 2014. Genome Sequences of *Lactobacillus* sp. Strains wkB8 and wkB10, Members of the Firm-5 Clade, from Honey Bee Guts. *Genome Announcements* 2:e01176–14–e01176–14.
- Kwong, W. K., and N. A. Moran. 2013. Cultivation and characterization of the gut

- symbionts of honey bees and bumble bees: *Snodgrassella alvi* gen. nov., sp. nov., a member of the Neisseriaceae family of the Betaproteobacteria; and *Gilliamella apicola* gen. nov., sp. nov., a member of Orbaceae fam. nov., Orbales ord. nov., a sister taxon to the Enterobacteriales order of the Gammaproteobacteria. *International Journal of Systematic and Evolutionary Microbiology* 63:2008–2018.
- Leonhardt, S. D., and M. Kaltenpoth. 2014. Microbial communities of three sympatric Australian stingless bee species. *PLoS ONE* 9:e105718.
- Martinson, V. G., B. N. Danforth, R. L. Minckley, O. Rueppell, S. Tingek, and N. A. Moran. 2011. A simple and distinctive microbiota associated with honey bees and bumble bees. *Molecular Ecology* 20:619–628.
- Martinson, V. G., J. Moy, and N. A. Moran. 2012. Establishment of characteristic gut bacteria during development of the honeybee worker. *Applied and Environmental Microbiology* 78:2830–2840.
- McFrederick, Q. S., J. J. Cannone, R. R. Gutell, K. Kellner, R. M. Plowes, and U. G. Mueller. 2013. Specificity between lactobacilli and hymenopteran hosts is the exception rather than the rule. *Applied and Environmental Microbiology* 79:1803–1812.
- McFrederick, Q. S., U. G. Mueller, and R. R. James. 2014a. Interactions between fungi and bacteria influence microbial community structure in the *Megachile rotundata* larval gut. *Proceedings Of The Royal Society B-Biological Sciences* 281:20132653.
- McFrederick, Q. S., W. T. Wcislo, D. R. Taylor, H. D. Ishak, S. E. Dowd, and U. G. Mueller. 2012. Environment or kin: whence do bees obtain acidophilic bacteria? *Molecular Ecology* 21:1754–1768.
- McFrederick, Q. S., W. T. Wcislo, M. C. Hout, and U. G. Mueller. 2014b. Host species and developmental stage, but not host social structure, affects bacterial community structure in socially polymorphic bees. *FEMS Microbiology Ecology* 88:398–406.
- Mohr, K., and C. Tebbe. 2006. Diversity and phylotype consistency of bacteria in the guts of three bee species (Apoidea) at an oilseed rape field. *Environmental Microbiology* 8:258–272.
- Olofsson, T. C., M. Alsterfjord, B. Nilson, É. Butler, and A. Vásquez. 2014. *Lactobacillus apinorum* sp. nov., *Lactobacillus mellifer* sp. nov., *Lactobacillus mellis* sp. nov., *Lactobacillus melliventris* sp. nov., *Lactobacillus kimbladii* sp. nov., *Lactobacillus helsingborgensis* sp. nov. and *Lactobacillus kullabergensis* sp. nov., isolated from the honey stomach of the honeybee *Apis mellifera*. *International Journal of Systematic and Evolutionary Microbiology* 64:3109–3119.
- Rokop, Z. P., M. A. Horton, and I. L. G. Newton. 2015. Interactions between co-occurring lactic acid bacteria in the honey bee hive. *Applied and Environmental Microbiology* 81:AEM.01259–15–7270.
- Vásquez, A., E. Forsgren, I. Fries, R. J. Paxton, E. Flaberg, L. Szekely, and T. C. Olofsson. 2012. Symbionts as major modulators of insect health: lactic acid bacteria and honeybees. *PLoS ONE* 7:e33188.
